# Supplementary material for: Phase stability of the tin monochalcogenides SnS and SnSe: a quasi-harmonic lattice-dynamics study
Source: Royal Society of Chemistry journal article supplement (doi:10.1039/d1cp02597j), 2021-01-01
Supplement: d1cp02597j1.pdf [file d1cp02597j1.pdf]

**Electronic Supplementary Information for:**

**Phase Stability of the Tin monochalcogenides SnS and SnSe: a Quasi-Harmonic Lattice-Dynamics Study**

Ioanna Pallikara<sup>a</sup> and Jonathan M. Skelton<sup>\*a</sup>

<sup>1</sup>*Department of Chemistry, University of Manchester, Oxford Road, Manchester M13 9PL, UK*

*\*E-Mail: jonathan.skelton@manchester.ac.uk*

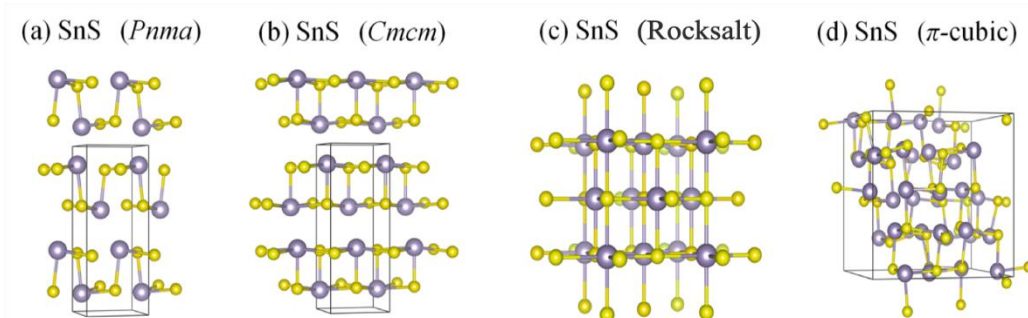

**Figure S1.** Optimised structures of *Pnma*, *Cmcm*, rocksalt and  $\pi$ -cubic SnS. These images were produced using the VESTA software.<sup>1</sup>

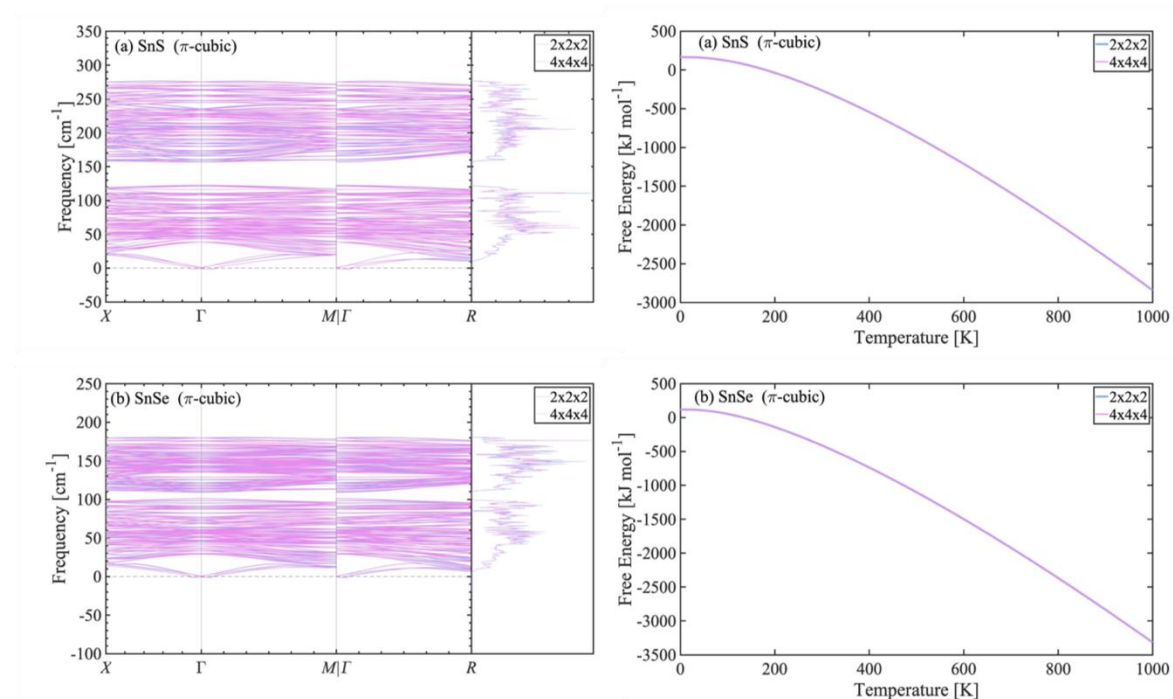

**Figure S2.** Phonon dispersion and density of states curves and vibrational Helmholtz free energy of the  $\pi$ -cubic phases of SnS (a) and SnSe (b) computed using two  $k$ -point meshes with  $2 \times 2 \times 2$  and  $4 \times 4 \times 4$  subdivisions. Both calculations were performed on the equilibrium structure using the 64-atom unit cell, so the equivalent  $k$ -point meshes for the  $2 \times 2 \times 2$  supercell used in the production calculations would be meshes with  $1 \times 1 \times 1$  (i.e. the  $\Gamma$  point) and  $2 \times 2 \times 2$  subdivisions.

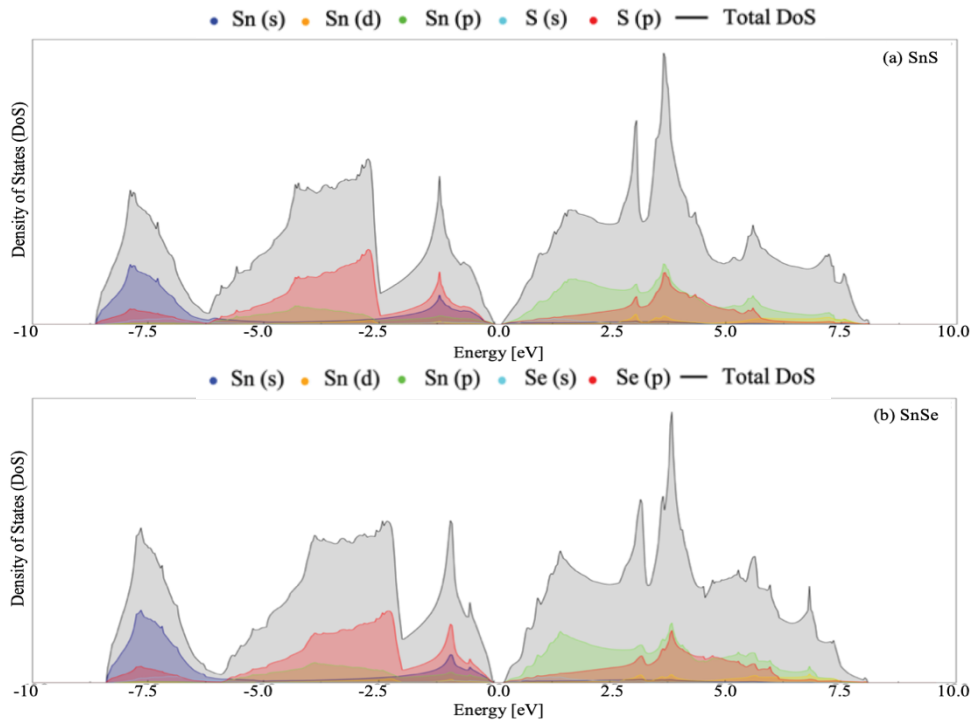

**Figure S3.** Calculated electronic atom- and orbital-projected density of states (DoS) curves for the rocksalt phases of (a) SnS and (b) SnSe. The states are colored as follows: Sn(s) - blue, Sn(d) - yellow, Sn(p) - green, S/Se(s) - cyan, S/Se(p) - red and total DoS - black.

**Table S1.** Calculated electronic bandgaps of the four phases of SnS (top) and SnSe (bottom) obtained using the PBEsol + D3 functional, with experimental and theoretical data for comparison where available.

| Bandgaps: SnS [eV]  |                            |                                          |                                                           |
|---------------------|----------------------------|------------------------------------------|-----------------------------------------------------------|
| Phase               | PBEsol + D3<br>(this work) | Experiments                              | Other DFT studies                                         |
| Rocksalt            | 0.15                       | -                                        | 0.52 <sup>2</sup>                                         |
| <i>Pnma</i>         | 0.579                      | 1.33-1.6 <sup>3</sup>                    | 1.352 <sup>4</sup> , 1.8 <sup>5</sup>                     |
| <i>Cmcm</i>         | 0.549                      | -                                        | 1.4 <sup>5</sup>                                          |
| $\pi$ -cubic        | 1.13 (indirect)            | 1.53 <sup>6</sup>                        | 1.74 <sup>7</sup>                                         |
| Bandgaps: SnSe [eV] |                            |                                          |                                                           |
| Phase               | PBEsol + D3<br>(this work) | Experiments                              | Other DFT studies                                         |
| Rocksalt            | 0.253                      | -                                        | 0.58 <sup>2</sup>                                         |
| <i>Pnma</i>         | 0.423                      | 0.89 <sup>8</sup> , 1.0-1.2 <sup>9</sup> | 0.79 <sup>10</sup> , 1.18, <sup>4</sup> 0.4 <sup>11</sup> |
| <i>Cmcm</i>         | 0.234                      | 0.39 <sup>8</sup>                        | 0.05 <sup>11</sup>                                        |
| $\pi$ -cubic        | 0.856 (indirect)           | 1.28 <sup>12</sup>                       | 0.799/1.011<br>(LDA/GGA) <sup>13</sup>                    |

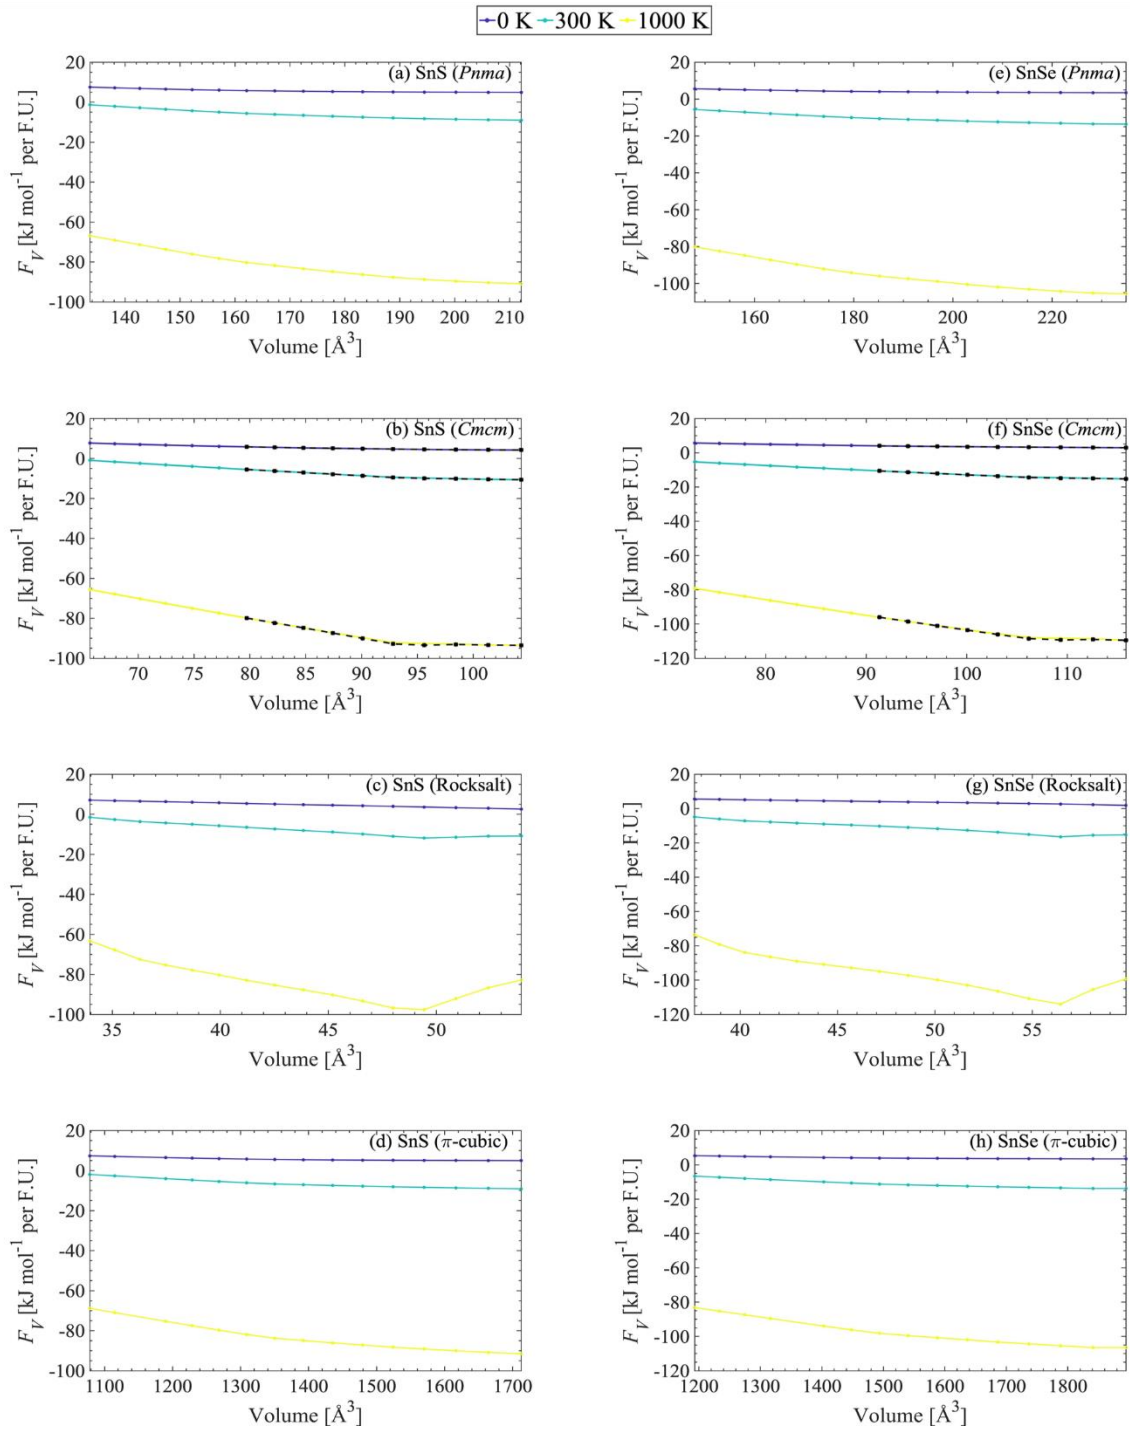

**Figure S4** Phonon free energy  $F_V$  as a function of volume for the eight tin monochalcogenide phases examined in this work at  $T = 0, 300$  and  $1000$  K. For the  $Cmcm$  phases in (b) and (f), the data overlaid in black shows the  $F_V$  obtained after renormalisation of the principal imaginary modes at the  $\Gamma$  and  $Y$  wavevectors.

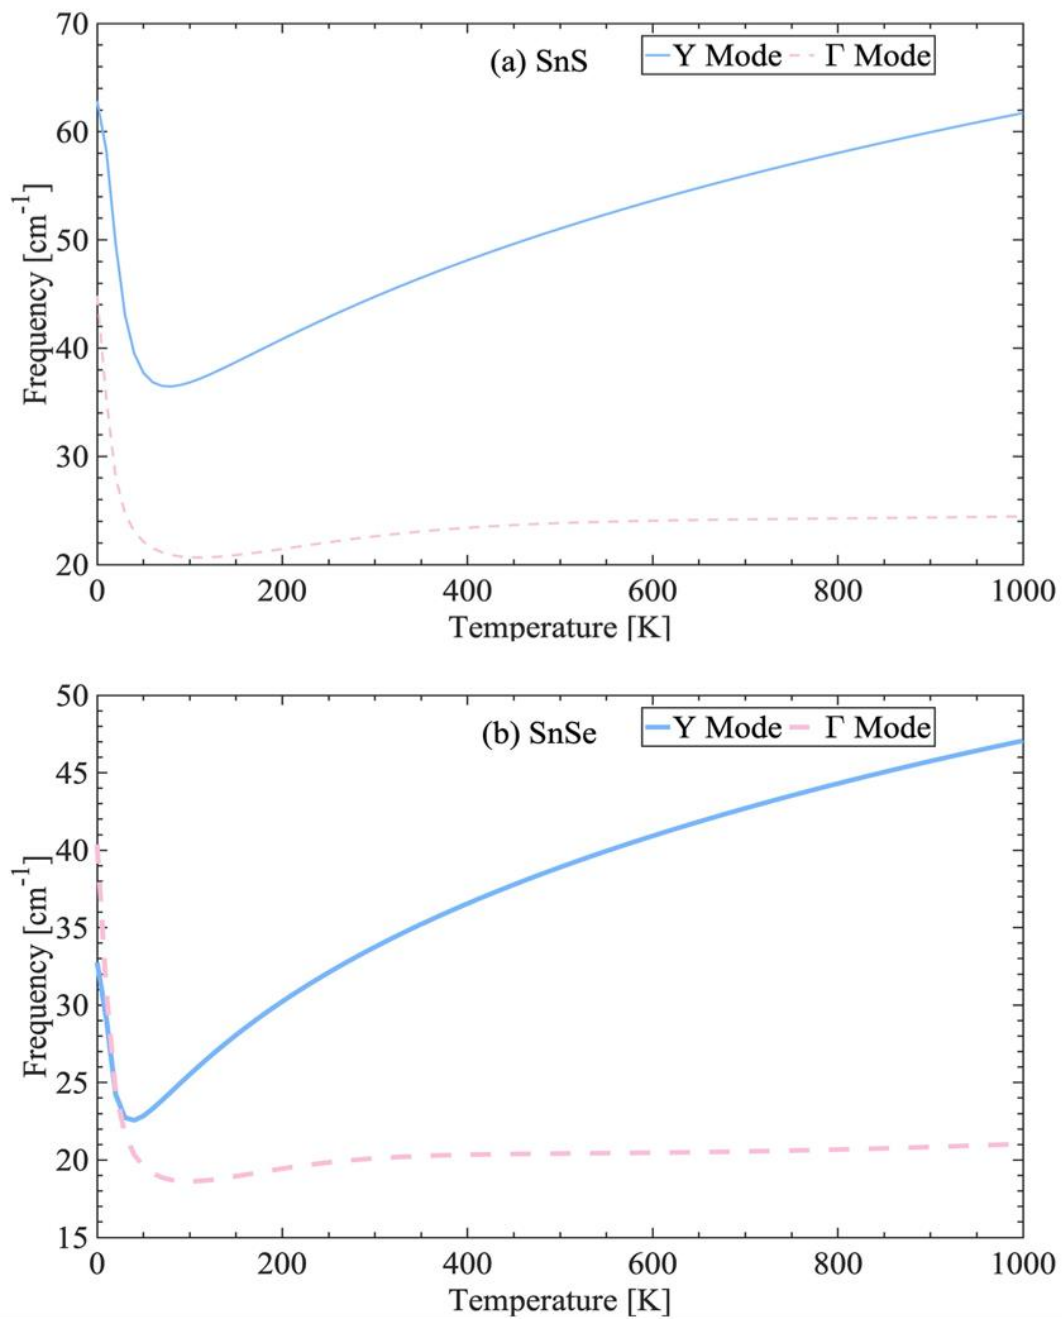

**Figure S5.** Effective renormalised frequencies of the two imaginary modes of *Cmcm* SnS (a) and SnSe (b) at the equilibrium volume, as a function of temperature, obtained using the method in Ref. 14.

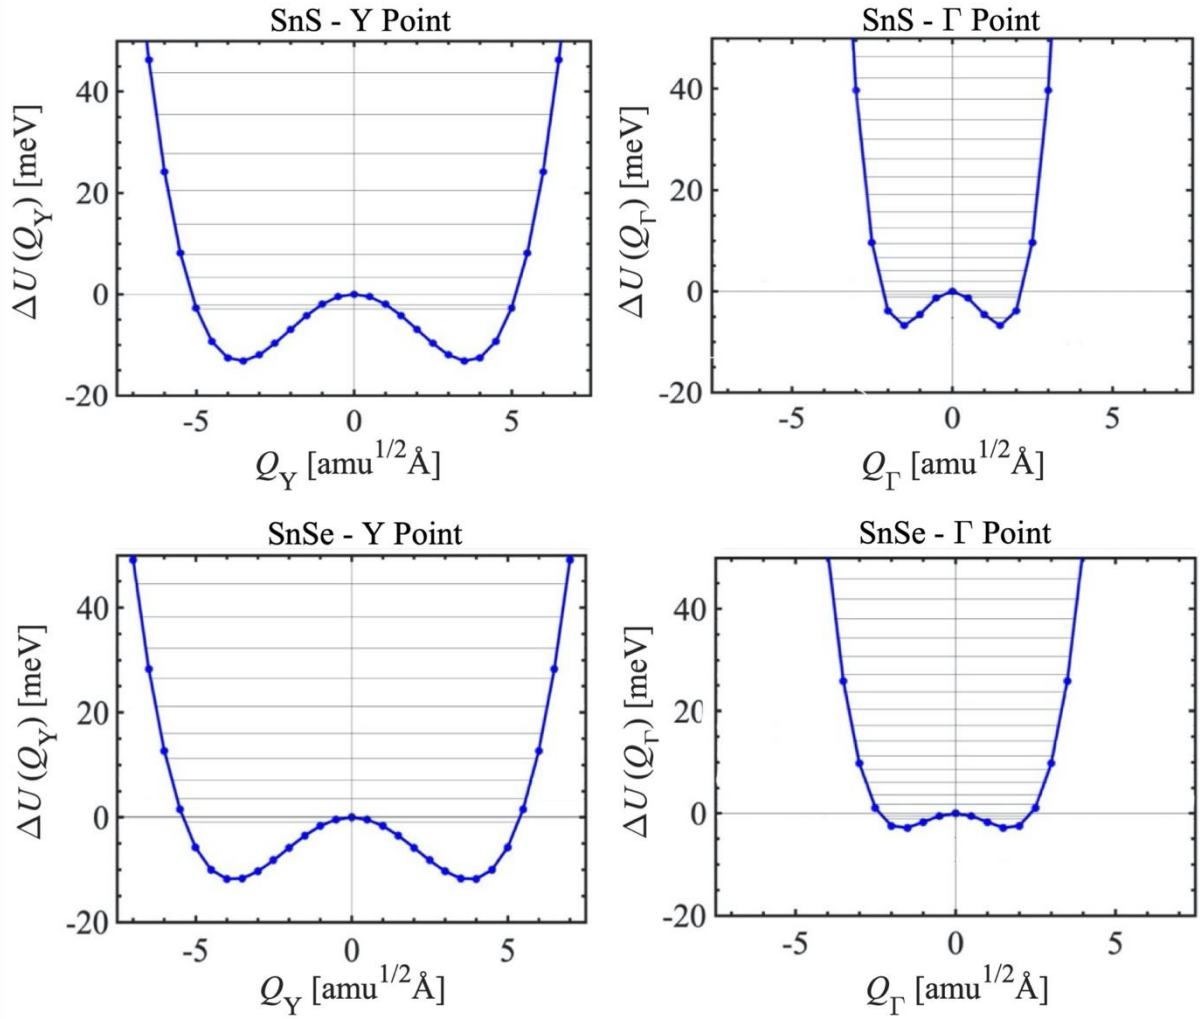

**Figure S6.** Anharmonic double-well potentials along the two principal imaginary modes at the Y and  $\Gamma$  wavevectors of *Cmcm* SnS (top) and SnSe (bottom) at the equilibrium volume. The black lines inside the potentials show the eigenvalues obtained by solving a 1D Schrödinger equation for the potential.

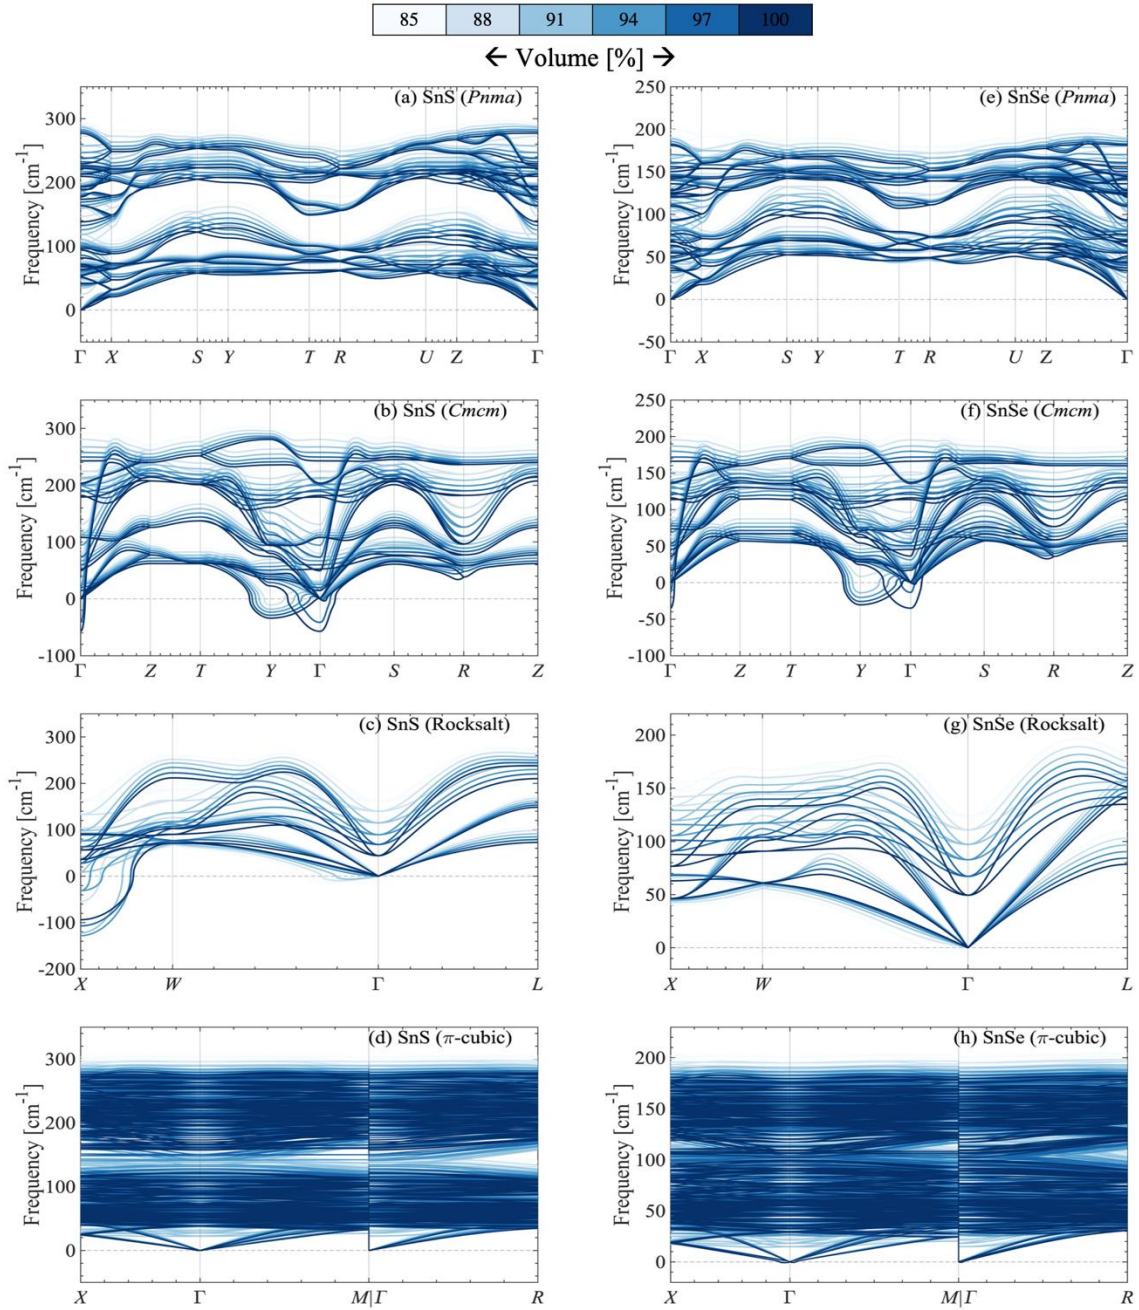

**Figure S7.** Phonon dispersion and density of states curves for SnS ((a)-(d), left) and SnSe ((e)-(h), right) under up to 15 % volume compression: (a)/(e) *Pnma*, (b)/(f) *Cmcm*, (c)/(g) rocksalt and (d)/(h)  $\pi$ -cubic.



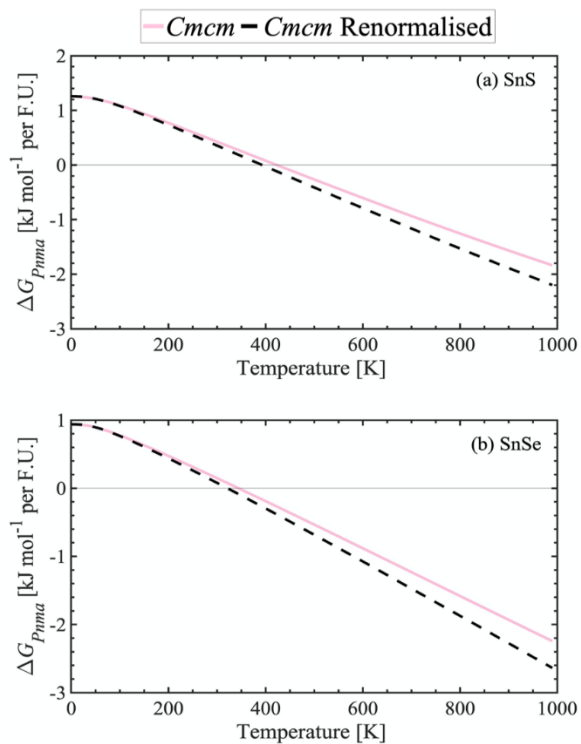

**Figure S8.** Gibbs energy differences  $\Delta G_{Pnma}$  between the *Pnma* and *Cmc* phases of (a) SnS and (b) SnSe before (pink) and after renormalization of the imaginary harmonic modes (black).

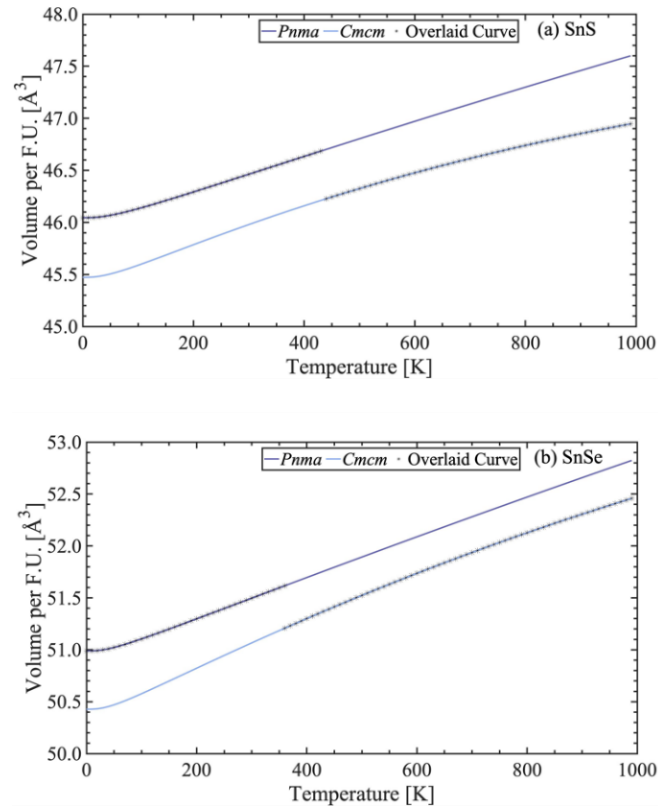

**Figure S9.** Calculated volume per formula unit as a function of temperature for the *Pnma* (purple) and *CmcM* (light blue) phases of (a) SnS and (b) SnSe. The black stars track the volumes of the phases with the lowest-energy Gibbs free energy to highlight expected discontinuities in the volume at the phase transition.

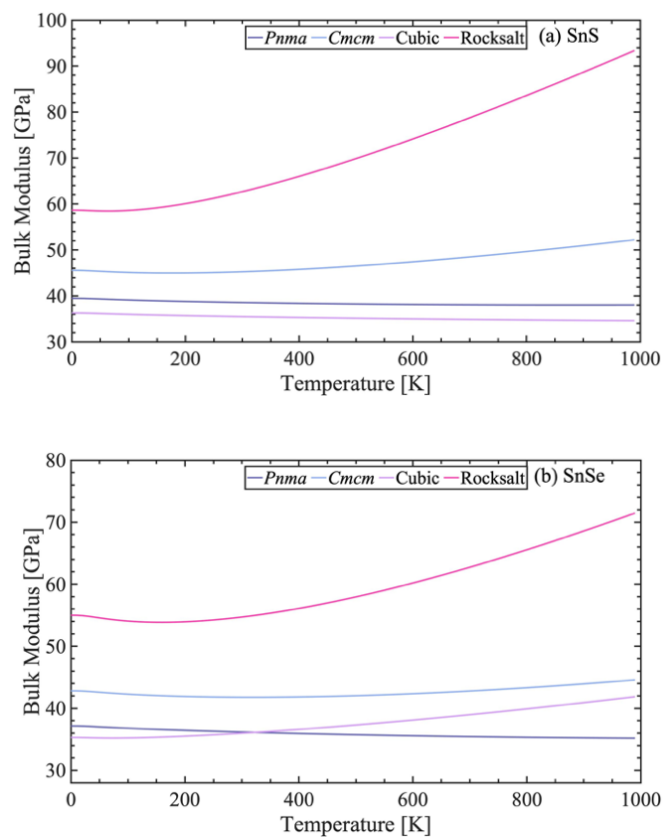

**Figure S10.** Calculated bulk modulus as a function of temperature for the *Pnma* (purple), *Cmc21* (light blue),  $\pi$ -cubic (purple) and rocksalt (pink) phases (a) SnS and (b) SnSe.

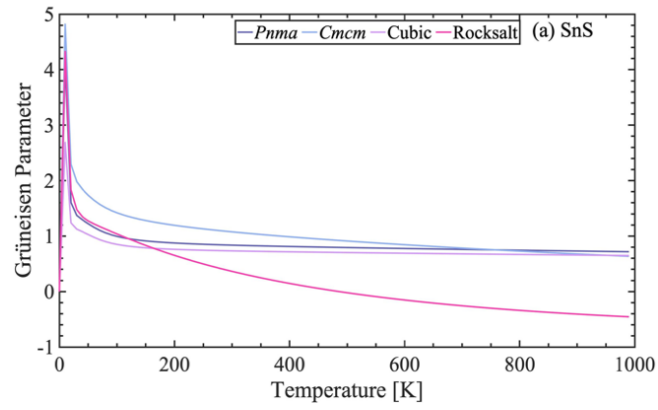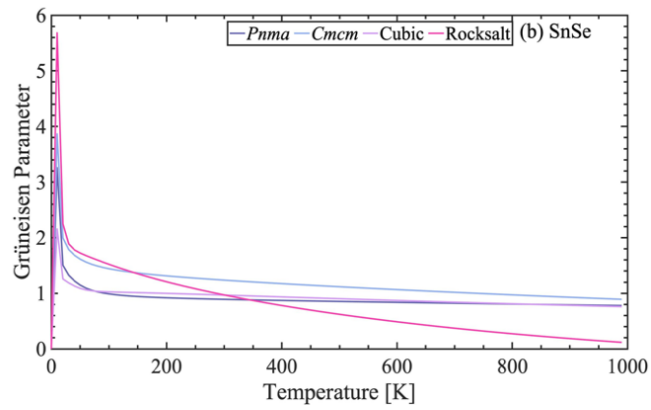

**Figure S11.** Calculated Grüneisen parameter as a function of temperature for the *Pnma* (purple), *Cmc* (light blue),  $\pi$ -cubic (dark blue) and rocksalt (pink) phases (a) SnS and (b) SnSe.

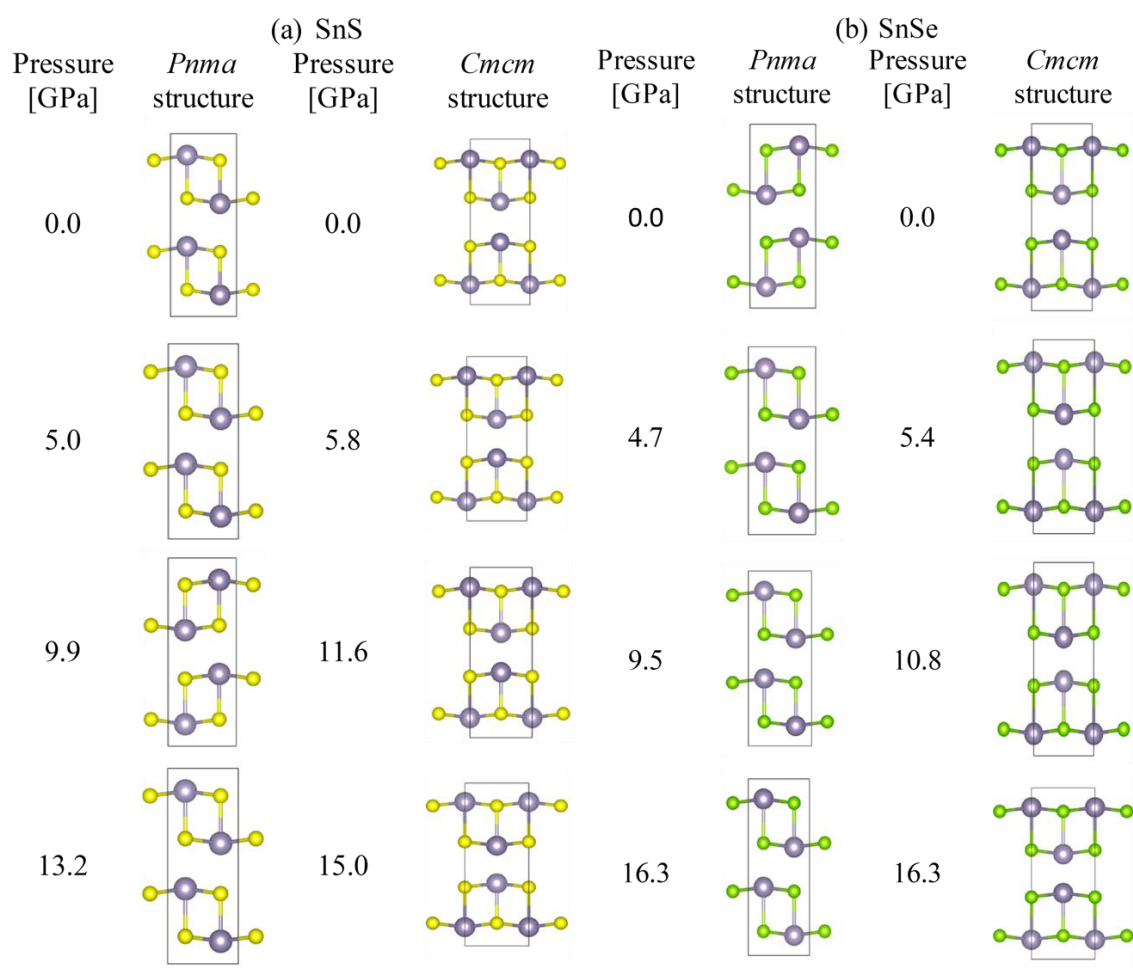

**Figure S12.** Optimized structures of *Pnma* and *Cmcm* SnS (a) and SnSe (b) at a range of applied pressures. The images were produced using the VESTA software.<sup>1</sup>

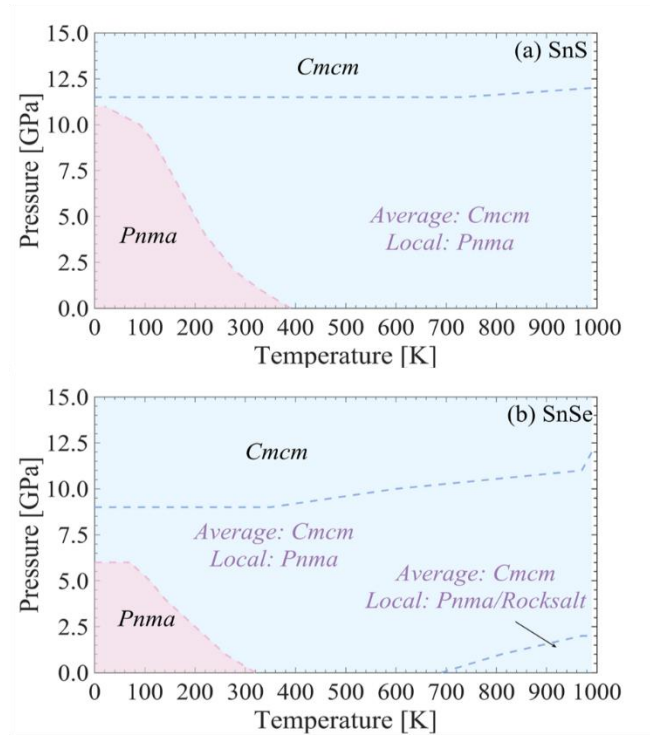

**Figure S13** Calculated temperature-pressure phase diagrams of (a) SnS and (b) SnSe, obtained based on the Gibbs energies calculated within the quasi-harmonic after renormalization of the imaginary harmonic modes in the *Cmc* phases. This may be compared with Fig. 9 in the text.

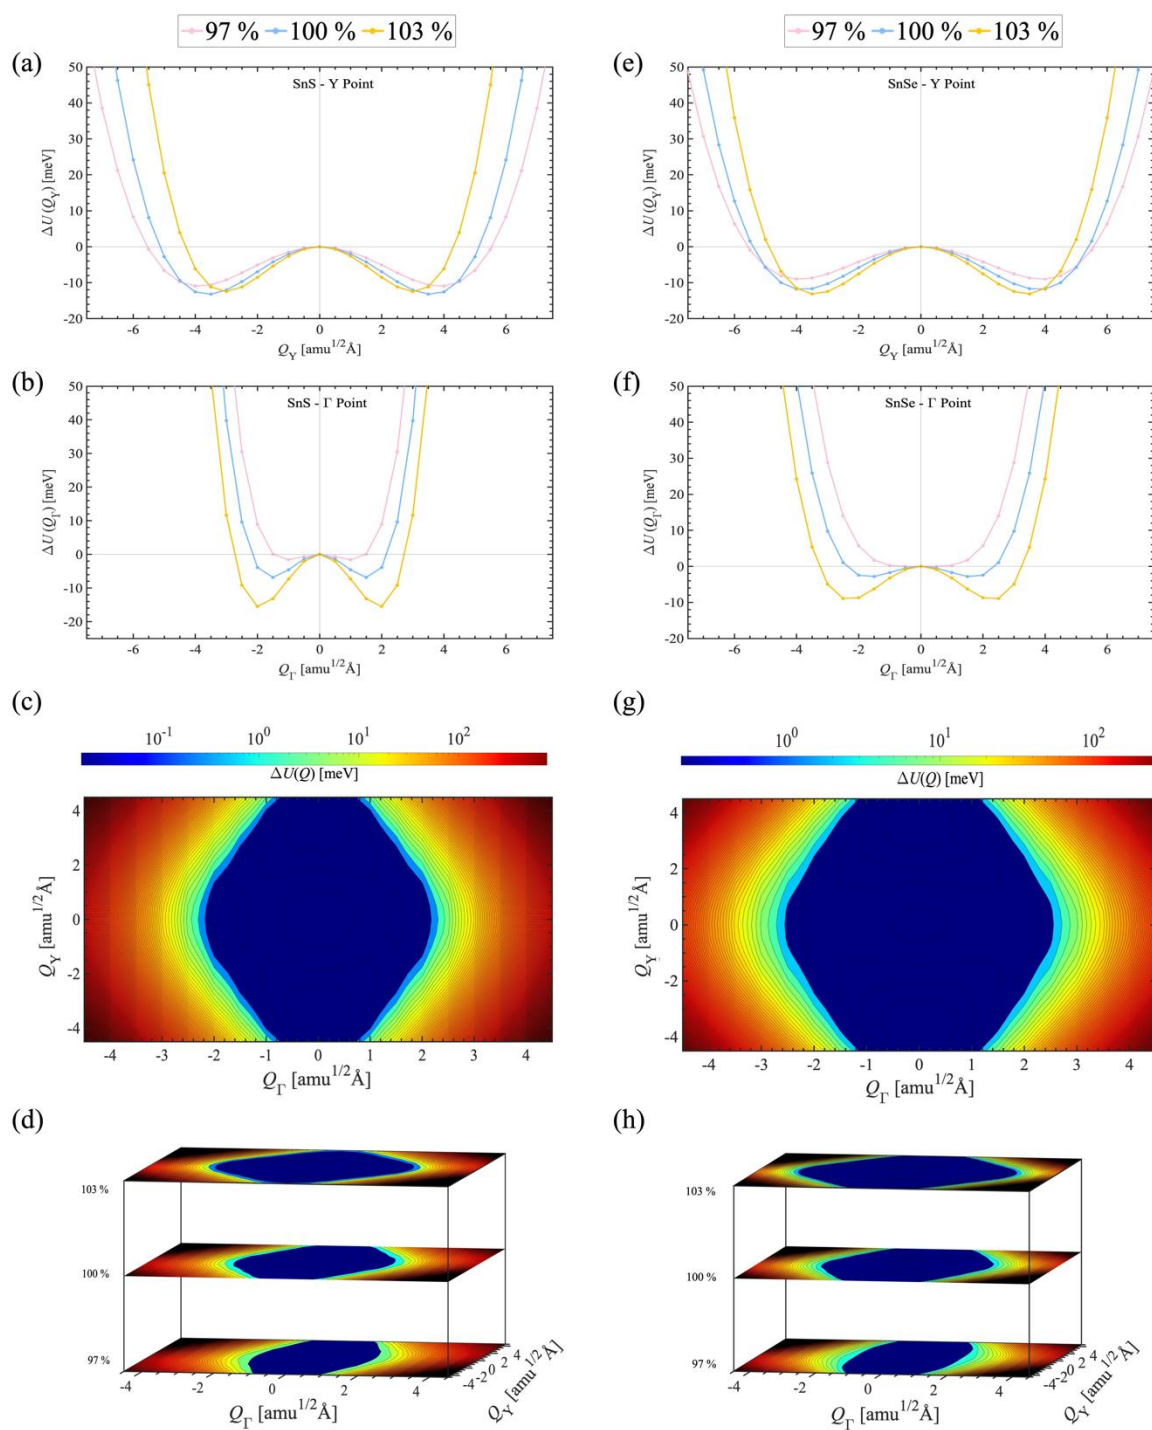

**Figure S14.** Potential-energy surface (PES) along the two principal imaginary modes at the Y- and  $\Gamma$  wavevectors in *Cmcm* SnS (a)/(b) and SnSe (e)/(f), evaluated at the equilibrium volume and 3 % expansions and compressions. (c)/(g) Two-dimensional PES spanned by both imaginary modes at the equilibrium volumes for (c) SnS and (g) SnSe. (d)/(h) Comparison of the 2D PES for the three volumes shown in (a)/(b) and (e)/(f).

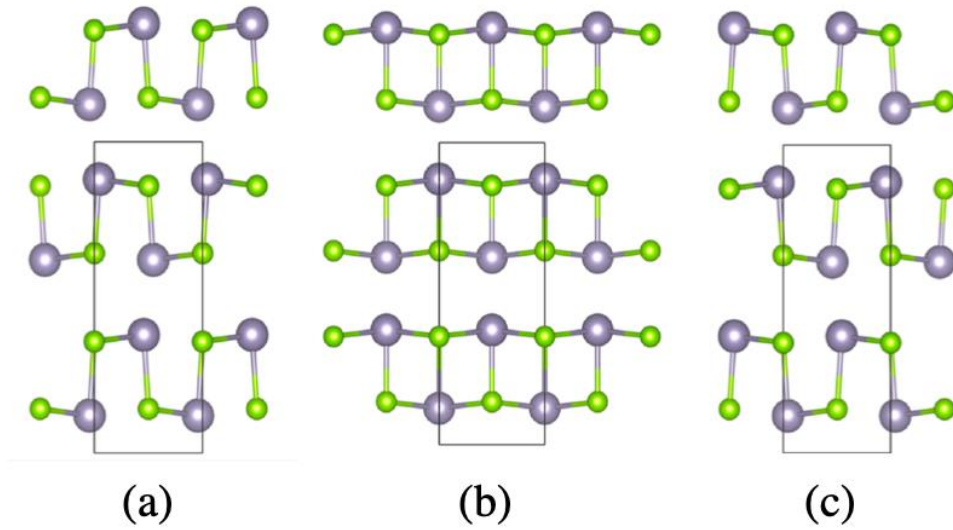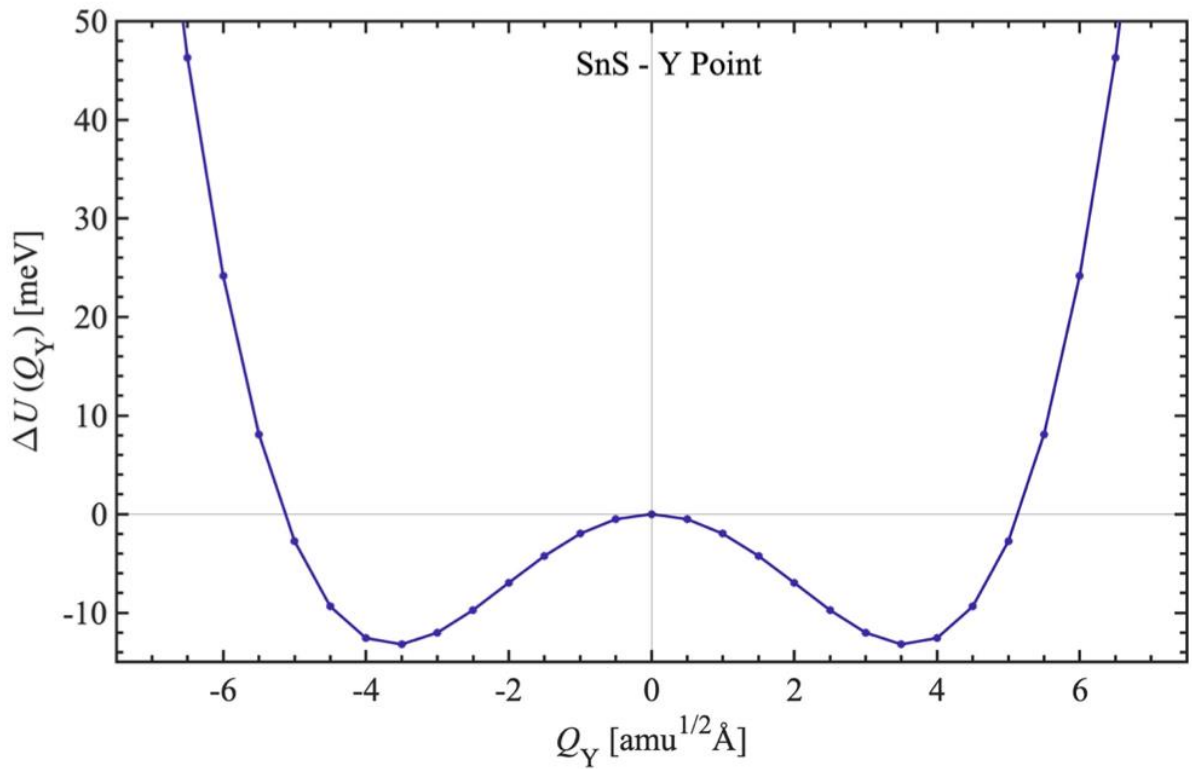

**Figure S15.** Structures of SnS associated with the minima in the 1D potential-energy surface (PES) obtained by mapping the Y-point imaginary mode in the equilibrium structure. (a) Minimum at  $Q = -3.5 \text{ amu}^{1/2} \text{ \AA}$ . (b) Maximum at  $Q = 0$ . (c) Minimum at  $Q = +3.5 \text{ amu}^{1/2} \text{ \AA}$ . (a) and (c) correspond to the distorted  $Pnma$  phase, while (b) corresponds to the  $Cmcm$  average structure.



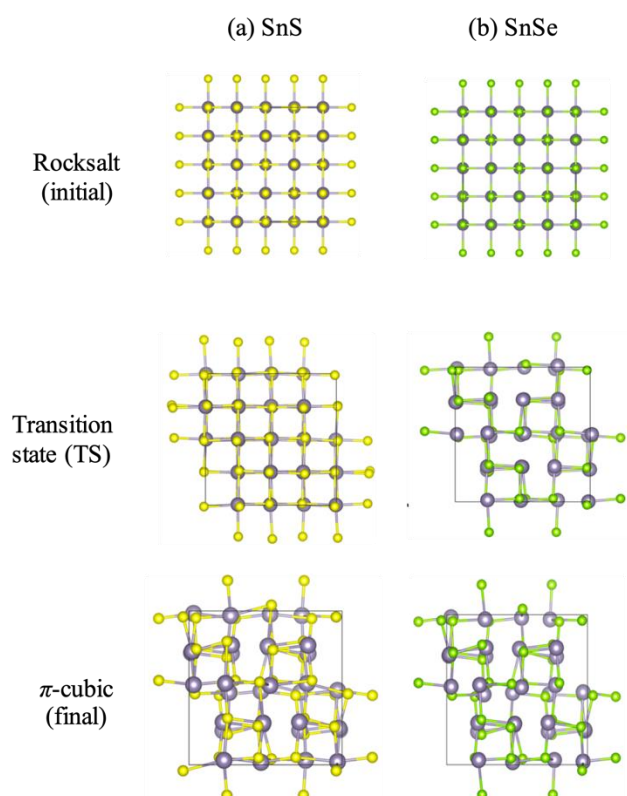

**Figure S16.** Structures of the initial (rocksalt), transition state (TS), and final ( $\pi$ -cubic) structures of SnS (a) and SnSe (b) obtained from the climbing image nudged elastic band (CI-NEB) calculations. These images were produced by the VESTA software.<sup>1</sup>

## References

- 1 K. Momma and F. Izumi, *J. Appl. Crystallogr.*, 2011, **44**, 1272–1276.
- 2 Y. Sun, Z. Zhong, T. Shirakawa, C. Franchini, D. Li, Y. Li, S. Yunoki and X. Q. Chen, *Phys. Rev. B - Condens. Matter Mater. Phys.*, 2013, **88**, 235122–235122.
- 3 G. Valiukonis, D. A. Guseinova, G. Krivaite and A. Sileika, *Phys. Status Solidi*, 1986, **135**, 299–307.
- 4 A. Walsh and G. W. Watson, *J. Phys. Chem. B*, 2005, **109**, 18868–18875.
- 5 N. Koteeswara Reddy, M. Devika and E. S. R. Gopal, *Crit. Rev. Solid State Mater. Sci.*, 2015, **40**, 359–398.
- 6 R. E. Abutbul, E. Segev, L. Zeiri, V. Ezersky, G. Makov and Y. Golan, *RSC Adv.*, 2016, **6**, 5848–5855.
- 7 J. M. Skelton, L. A. Burton, F. Oba and A. Walsh, *APL Mater.*, 2016, **5**, 036101.
- 8 L. D. Zhao, S. H. Lo, Y. Zhang, H. Sun, G. Tan, C. Uher, C. Wolverton, V. P. Dravid and M. G. Kanatzidis, *Nature*, 2014, **508**, 373–377.
- 9 F. D. Murnaghan, *Proc. Natl. Acad. Sci. U.S.A.*, 1944, **30**, 244–247.
- 10 L. T. Yang, L. P. Ding, P. Shao, Y. H. Tiandong, Z. L. Zhao, F. H. Zhang and C. Lu, *J. Alloys Compd.*, 2021, **853**, 157362.
- 11 Y. Lu, F. W. Zheng, Y. Yang, P. Zhang and D. B. Zhang, *Phys. Rev. B*, 2019, **100**, 054304.
- 12 R. E. Abutbul, E. Segev, S. Samuha, L. Zeiri, V. Ezersky, G. Makov and Y. Golan, *CrystEngComm*, 2016, **18**, 1918–1923.
- 13 S. U. Rehman, F. K. Butt, F. Hayat, B. Ul Haq, Z. Tariq, F. Aleem and C. Li, *J. Alloys Compd.*, 2018, **733**, 22–32.
- 14 J. M. Skelton, L. A. Burton, S. C. Parker, A. Walsh, C.-E. Kim, A. Soon, J. Buckeridge, A. A. Sokol, C. R. A. Catlow, A. Togo and I. Tanaka, *Phys. Rev. Lett.*, 2016, **117**, 075502.
